# Supplementary material
Source: PubMed Central journal article supplement (PMC2633583)
Supplement: 0809600106_0809600106SI.pdf [file 0809600106_0809600106SI.pdf]

# Supporting Information

Selva *et al* 10.1073/pnas.0809600106

Table S1. Strains used in this study

| Strains                    | Description                                          | Ref.      |
|----------------------------|------------------------------------------------------|-----------|
| <i>S. aureus</i>           |                                                      |           |
| V329                       | Clinical strain                                      | 1         |
| FRI-56                     | Clinical strain                                      | 2         |
| RF122                      | Clinical strain                                      | 3         |
| Mu50                       | Clinical strain                                      | 4         |
| COL                        | Clinical strain                                      | 5         |
| LUG855                     | RN6390 $\phi$ SLT                                    | 6         |
| KS100                      | <i>katA</i> -mutant                                  | 7         |
| RN450                      | NCTC8325 cured of $\phi$ 11, $\phi$ 12 and $\phi$ 13 | 8         |
| RN4220                     | Restriction-defective derivative of RN450            | 8         |
| RN451                      | RN450 lysogenic for $\phi$ 11                        | 8         |
| RN1030                     | <i>recA</i> <sup>-</sup> mutant of RN451             | 9         |
| RN10359                    | RN450 lysogenic for 80 $\alpha$                      | 10        |
| JP3592                     | RN10359 cl G130E                                     | This work |
| JP3603                     | RN10359 (SaPIbov1 <i>tst::tetM</i> )                 | This work |
| JP3656                     | JP3592 (SaPIbov1 <i>tst::tetM</i> )                  | This work |
| JP3852                     | RN450 <i>katA</i> -mutant                            | This work |
| JP3853                     | RN10359 <i>katA</i> -mutant                          | This work |
| <i>S. pneumoniae</i>       |                                                      |           |
| 623                        | Lysogenic strain                                     |           |
| 949                        | Lysogenic strain                                     |           |
| TIGR4                      | Clinical isolate                                     | 11        |
| Pn-20                      | Nasopharyngeal human isolate                         | 11        |
| TIGR4 $\Delta$ <i>spxB</i> | Nonproducer H <sub>2</sub> O <sub>2</sub> strain     | 11        |
| Pn-20 $\Delta$ <i>spxB</i> | Nonproducer H <sub>2</sub> O <sub>2</sub> strain     | 11        |

- Cucarella C, *et al.* (2001) Bap, a *Staphylococcus aureus* surface protein involved in biofilm formation. *J Bacteriol* 183:2888–2896.
- Shafer WM, Iandolo JJ (1978) Chromosomal locus for staphylococcal enterotoxin B. *Infect Immun* 20:273–278.
- Fitzgerald JR, *et al.* (2001) Characterization of a putative pathogenicity island from bovine *Staphylococcus aureus* encoding multiple superantigens. *J Bacteriol* 183:63–70.
- Baba T, *et al.* (2002) Genome and virulence determinants of high virulence community-acquired MRSA. *Lancet* 359:1819–1827.
- Gill SR, Fouts DE, *et al.* (2005) Insights on evolution of virulence and resistance from the complete genome analysis of an early methicillin-resistant *Staphylococcus aureus* strain and a biofilm-producing methicillin-resistant *Staphylococcus epidermidis* strain. *J Bacteriol* 187:2426–2438.
- Labandeira-Rey M, *et al.* (2007) *Staphylococcus aureus* Panton-Valentine leukocidin causes necrotizing pneumonia. *Science* 315:1130–1133.
- Cosgrove K, *et al.* (2007) Catalase (KatA) and alkyl hydroperoxide reductase (AhpC) have compensatory roles in peroxide stress resistance and are required for survival, persistence, and nasal colonization in *Staphylococcus aureus*. *J Bacteriol* 189:1025–1035.
- Novick R (1967) Properties of a cryptic high-frequency transducing phage in *Staphylococcus aureus*. *Virology* 33:155–166.
- Wyman L, Goering RV, Novick RP (1974) Genetic control of chromosomal and plasmid recombination in *Staphylococcus aureus*. *Genetics* 76:681–702.
- Ubeda C, Barry P, Penades JR, Novick RP (2007) A pathogenicity island replicon in *Staphylococcus aureus* replicates as an unstable plasmid. *Proc Natl Acad Sci USA* 104:14182–14188.
- Regev-Yochay G, Trzcinski K, Thompson CM, Malley R, Lipsitch M (2006) Interference between *Streptococcus pneumoniae* and *Staphylococcus aureus*: In vitro hydrogen peroxide-mediated killing by *Streptococcus pneumoniae*. *J Bacteriol* 188:4996–5001.



**Table S3. Production of SaPI particles after incubation with *S. pneumoniae* strains**

| Donor strain                   | Phage           | SaPI     | Inducer*                      | SaPI titer <sup>†</sup> |
|--------------------------------|-----------------|----------|-------------------------------|-------------------------|
| JP3603                         | $\phi 80\alpha$ | SaPIbov1 | H <sub>2</sub> O <sub>2</sub> | $3.8 \times 10^8$       |
|                                |                 |          | Pn-20                         | $1.7 \times 10^7$       |
|                                |                 |          | Pn-20 $\Delta spxB$           | $1.2 \times 10^5$       |
|                                |                 |          | TIGR4                         | $8.0 \times 10^6$       |
|                                |                 |          | TIGR4 $\Delta spxB$           | $1.1 \times 10^5$       |
|                                |                 |          | NI                            | $1.1 \times 10^5$       |
| JP JP3656<br>(JP3603 cl G130E) | $\phi 80\alpha$ | SaPIbov1 | H <sub>2</sub> O <sub>2</sub> | <10                     |
|                                |                 |          | Pn-20                         | <10                     |
|                                |                 |          | Pn-20 $\Delta spxB$           | <10                     |
|                                |                 |          | TIGR4                         | <10                     |
|                                |                 |          | TIGR4 $\Delta spxB$           | <10                     |
|                                |                 |          | NI                            | <10                     |

The means of results from 3 independent experiments are presented. Variation was within  $\pm 5\%$  in all cases.

\*H<sub>2</sub>O<sub>2</sub> (0.5 mM). NI, not induced.

<sup>†</sup>Number of SaPI particles per milliliter of induced culture, using RN4220 as recipient strain.
